# Supplementary material
Source: publisher figshare collection journal article supplement (https://gsajournals.figshare.com/ndownloader/files/24625802)
Supplement: Supplementary file 1 [file 24625802]

## Sheet: Sheet1
Table S5: GO categories. This table reports the results of a GO category analysis for mostly zygotic genes that are changing in trans regulation. The first column reports the cross associated with each GO category, the category column is either MF for molecular function or BP for biological process, the ID column reports the associated GO category ID, the term column describes each GO category, B…
Cross	Category	ID	Term	Bonferroni_adj_pval	up_down	trans_changes_observed	genes_expected
mauxsec	MF	GO:0000981	DNA-binding transcription factor activity, RNA polymerase II-specific	4.66e-07	+	13	1.26
mauxsec	MF	GO:0000977	RNA polymerase II regulatory region sequence-specific DNA binding	0.000503	+	10	1.26
mauxsec	MF	GO:0001012	RNA polymerase II regulatory region DNA binding	0.000758	+	10	1.32
mauxsec	MF	GO:0003700	DNA-binding transcription factor activity	9.46e-06	+	15	2.37
mauxsec	MF	GO:0000976	transcription regulatory region sequence-specific DNA binding	0.00179	+	11	1.84
mauxsec	MF	GO:0043565	sequence-specific DNA binding	2.45e-06	+	17	2.91
mauxsec	MF	GO:0044212	transcription regulatory region DNA binding	0.000882	+	12	2.09
mauxsec	MF	GO:0001067	regulatory region nucleic acid binding	0.000882	+	12	2.09
mauxsec	MF	GO:1990837	sequence-specific double-stranded DNA binding	0.00351	+	11	1.98
mauxsec	MF	GO:0003690	double-stranded DNA binding	0.00962	+	11	2.22
mauxsec	MF	GO:0140110	transcription regulator activity	0.00059	+	15	3.32
mauxsec	MF	GO:0003677	DNA binding	0.000562	+	19	5.39
mauxsim	MF	GO:0000981	DNA-binding transcription factor activity, RNA polymerase II-specific	4.64e-06	+	13	1.49
mauxsim	MF	GO:0000977	RNA polymerase II regulatory region sequence-specific DNA binding	6.09e-05	+	12	1.54
mauxsim	MF	GO:0001012	RNA polymerase II regulatory region DNA binding	9.78e-05	+	12	1.62
mauxsim	MF	GO:0003700	DNA-binding transcription factor activity	2.01e-06	+	17	2.75
mauxsim	MF	GO:0043565	sequence-specific DNA binding	1.9e-06	+	19	3.55
mauxsim	MF	GO:0000976	transcription regulatory region sequence-specific DNA binding	0.003	+	12	2.29
mauxsim	MF	GO:1990837	sequence-specific double-stranded DNA binding	0.00736	+	12	2.52
mauxsim	MF	GO:0044212	transcription regulatory region DNA binding	0.0104	+	12	2.61
mauxsim	MF	GO:0001067	regulatory region nucleic acid binding	0.0104	+	12	2.61
mauxsim	MF	GO:0140110	transcription regulator activity	6.74e-05	+	18	4.01
mauxsim	MF	GO:0003690	double-stranded DNA binding	0.0226	+	12	2.84
mauxsim	MF	GO:0003677	DNA binding	0.00196	+	21	6.83
secxmau	MF	GO:0000981	DNA-binding transcription factor activity, RNA polymerase II-specific	1.1e-06	+	12	1.1
secxmau	MF	GO:0000977	RNA polymerase II regulatory region sequence-specific DNA binding	0.0134	+	8	1.11
secxmau	MF	GO:0001012	RNA polymerase II regulatory region DNA binding	0.0187	+	8	1.17
secxmau	MF	GO:0003700	DNA-binding transcription factor activity	2.22e-05	+	14	2.18
secxmau	MF	GO:0000976	transcription regulatory region sequence-specific DNA binding	0.0281	+	9	1.63
secxmau	MF	GO:0043565	sequence-specific DNA binding	0.00122	+	13	2.61
secxmau	MF	GO:0140110	transcription regulator activity	0.00111	+	14	3.05
simxmau	MF	GO:0000981	DNA-binding transcription factor activity, RNA polymerase II-specific	0.0168	+	9	1.48
simxmau	MF	GO:0003700	DNA-binding transcription factor activity	0.0205	+	12	2.82
simxsec	MF	GO:0016015	morphogen activity	0.0397	+	3	0.05
simxsec	MF	GO:0000977	RNA polymerase II regulatory region sequence-specific DNA binding	0.0114	+	8	1.09
simxsec	MF	GO:0001012	RNA polymerase II regulatory region DNA binding	0.0165	+	8	1.15
mauxsec	BP	GO:0035287	head segmentation	0.00261	+	5	0.14
mauxsec	BP	GO:0007400	neuroblast fate determination	0.000673	+	6	0.22
mauxsec	BP	GO:0048867	stem cell fate determination	0.00093	+	6	0.24
mauxsec	BP	GO:0014017	neuroblast fate commitment	0.00126	+	6	0.25
mauxsec	BP	GO:0048865	stem cell fate commitment	0.00169	+	6	0.27
mauxsec	BP	GO:0014016	neuroblast differentiation	0.00472	+	6	0.33
mauxsec	BP	GO:0007419	ventral cord development	0.000536	+	8	0.58
mauxsec	BP	GO:0048863	stem cell differentiation	0.0197	+	6	0.44
mauxsec	BP	GO:0060322	head development	0.000643	+	9	0.85
mauxsec	BP	GO:0007417	central nervous system development	7.98e-07	+	15	1.79
mauxsec	BP	GO:0000122	negative regulation of transcription by RNA polymerase II	0.0265	+	8	1.04
mauxsec	BP	GO:0001709	cell fate determination	0.0265	+	8	1.04
mauxsec	BP	GO:0045165	cell fate commitment	0.0008	+	12	1.85
mauxsec	BP	GO:0045944	positive regulation of transcription by RNA polymerase II	0.0222	+	11	2.15
mauxsec	BP	GO:0006357	regulation of transcription by RNA polymerase II	0.00503	+	16	4.13
mauxsec	BP	GO:0007399	nervous system development	0.000181	+	22	6.3
mauxsec	BP	GO:0022008	neurogenesis	0.0205	+	17	5.2
mauxsec	BP	GO:0048699	generation of neurons	0.0463	+	16	4.95
mauxsec	BP	GO:0048513	animal organ development	0.00982	+	21	7.34
mauxsim	BP	GO:0010004	gastrulation involving germ band extension	0.0176	+	6	0.41
mauxsim	BP	GO:0001703	gastrulation with mouth forming first	0.0176	+	6	0.41
mauxsim	BP	GO:0007369	gastrulation	0.0329	+	7	0.73
mauxsim	BP	GO:0006357	regulation of transcription by RNA polymerase II	0.00263	+	19	5.36
mauxsim	BP	GO:0035295	tube development	0.0464	+	17	5.38
mauxsim	BP	GO:2001141	regulation of RNA biosynthetic process	0.00132	+	25	8.63
mauxsim	BP	GO:0006355	regulation of transcription, DNA-templated	0.00132	+	25	8.63
mauxsim	BP	GO:1903506	regulation of nucleic acid-templated transcription	0.00132	+	25	8.63
mauxsim	BP	GO:0051252	regulation of RNA metabolic process	0.00685	+	25	9.46
mauxsim	BP	GO:0019219	regulation of nucleobase-containing compound metabolic process	0.01	+	25	9.67
mauxsim	BP	GO:2000112	regulation of cellular macromolecule biosynthetic process	0.0123	+	25	9.78
mauxsim	BP	GO:0010556	regulation of macromolecule biosynthetic process	0.0132	+	25	9.82
mauxsim	BP	GO:0031326	regulation of cellular biosynthetic process	0.0215	+	25	10.1
mauxsim	BP	GO:0009889	regulation of biosynthetic process	0.0229	+	25	10.14
mauxsim	BP	GO:0009653	anatomical structure morphogenesis	0.0399	+	26	11.04
secxmau	BP	GO:0035287	head segmentation	0.02	+	4	0.1
secxmau	BP	GO:0060322	head development	0.0177	+	7	0.69
secxmau	BP	GO:0045944	positive regulation of transcription by RNA polymerase II	0.0375	+	10	1.87
secxmau	BP	GO:0006357	regulation of transcription by RNA polymerase II	0.0257	+	14	3.67
secxmau	BP	GO:0009887	animal organ morphogenesis	0.00548	+	16	4.22
secxmau	BP	GO:0035295	tube development	0.0144	+	15	4.01
secxmau	BP	GO:0007399	nervous system development	0.0125	+	18	5.66
simxmau	BP	GO:0007417	central nervous system development	0.000891	+	12	1.82
simxmau	BP	GO:0006935	chemotaxis	0.02	+	11	2.08
simxmau	BP	GO:0007409	axonogenesis	0.0234	+	11	2.11
simxmau	BP	GO:0061564	axon development	0.0315	+	11	2.19
simxmau	BP	GO:0042330	taxis	0.0133	+	12	2.4
simxmau	BP	GO:0040011	locomotion	0.000642	+	18	4.37
simxmau	BP	GO:0006928	movement of cell or subcellular component	0.00187	+	18	4.72
simxmau	BP	GO:0060562	epithelial tube morphogenesis	0.0395	+	14	3.68
simxmau	BP	GO:0035295	tube development	0.000513	+	20	5.34
simxmau	BP	GO:0035239	tube morphogenesis	0.0266	+	15	4.06
simxmau	BP	GO:0007444	imaginal disc development	0.0416	+	15	4.23
simxmau	BP	GO:0007399	nervous system development	0.013	+	21	7.23
simxmau	BP	GO:0048731	system development	0.00122	+	30	12.02
simxmau	BP	GO:0034641	cellular nitrogen compound metabolic process	0.011	-	1	14.04
simxsec	BP	GO:0035224	genital disc anterior/posterior pattern formation	0.006	+	4	0.06
simxsec	BP	GO:0035221	genital disc pattern formation	0.006	+	4	0.06
simxsec	BP	GO:0007398	ectoderm development	0.00926	+	5	0.2
simxsec	BP	GO:0007367	segment polarity determination	0.0212	+	5	0.25
simxsec	BP	GO:0007365	periodic partitioning	0.0429	+	5	0.29
simxsec	BP	GO:0007498	mesoderm development	0.00949	+	6	0.38
simxsec	BP	GO:0001709	cell fate determination	0.0262	+	8	1.04
simxsec	BP	GO:0045165	cell fate commitment	0.00226	+	11	1.69
simxsec	BP	GO:0003002	regionalization	0.00786	+	13	2.81
simxsec	BP	GO:0007389	pattern specification process	0.0231	+	13	3.12
